# Supplementary material for: Understanding Severe Winter Haze Pollution in the North-Central North China Plain in 2014
Source: Copernicus journal article supplement (doi:10.5194/acp-2016-641), 2016-08-01
Supplement: Supplementary file 1 [file acp-2016-641-supplement.pdf]

1 **Supplemental Materials**

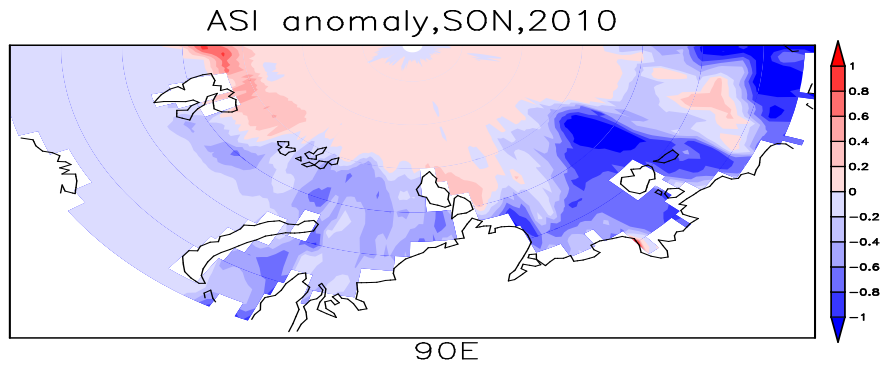

6 **Figure S1. Anomalies of pre-autumn ASI in 2010**

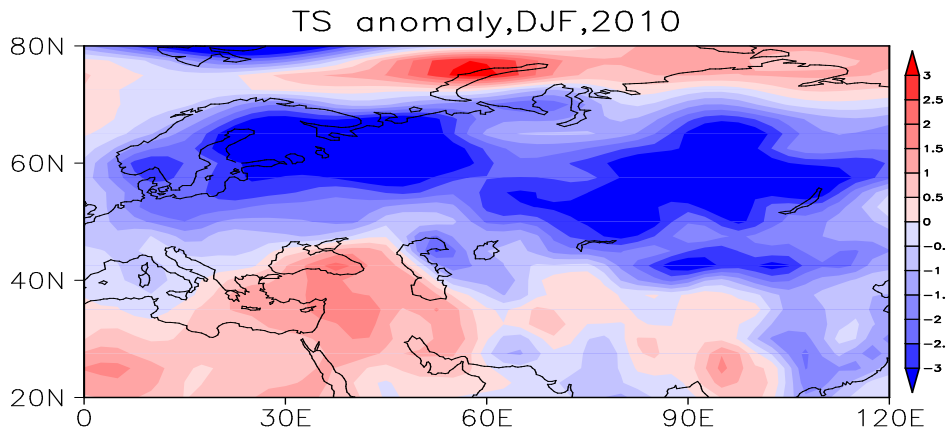

**Figure S2. Anomalies of winter TS in 2010**

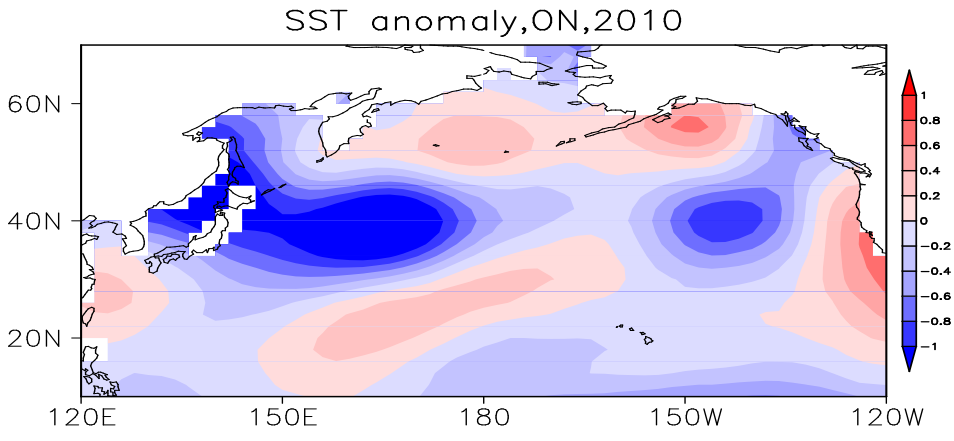

11  
12 **Figure S3. Anomalies of ON SST in 2010**

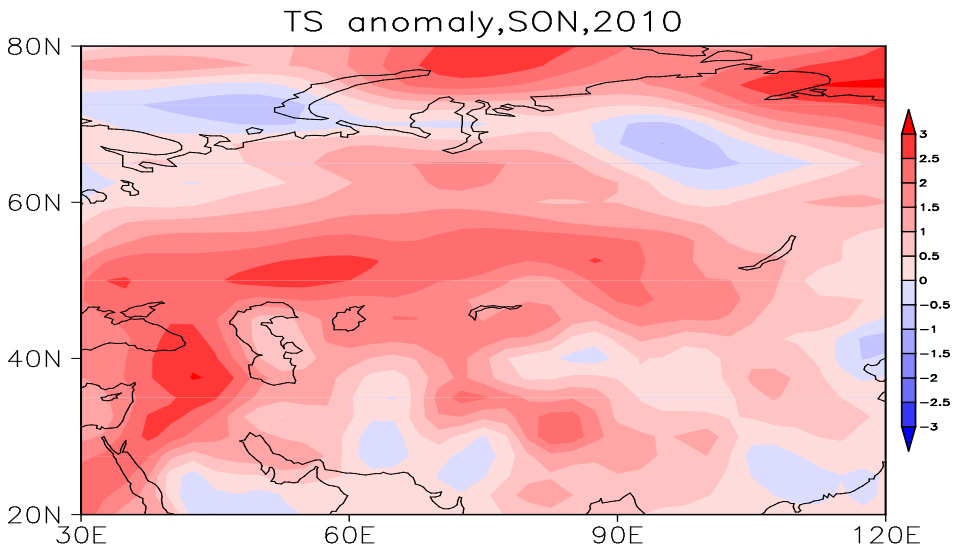

14  
15 **Figure S4. Anomalies of pre-autumn TS in 2010**

16  
17  
18  
19

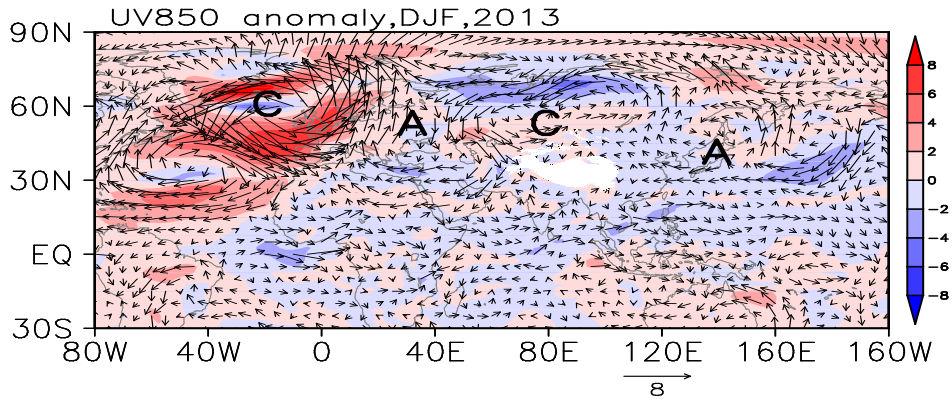

20  
21  
22  
23  
24  
25  
26

Figure S5. UV850 (arrow) and speed (shade) anomalies in 2013. A and C represent anti-cyclone and cyclone, respectively.

(a) ASI anomaly, SON, 2013

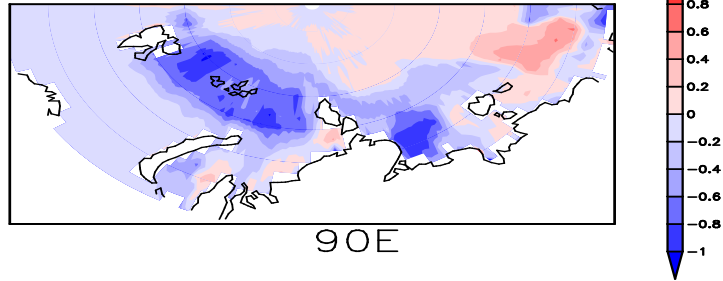

27

(b) TS anomaly, DJF, 2013

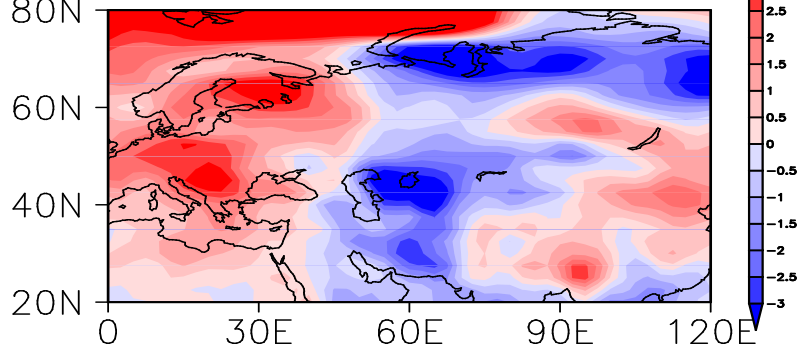

28

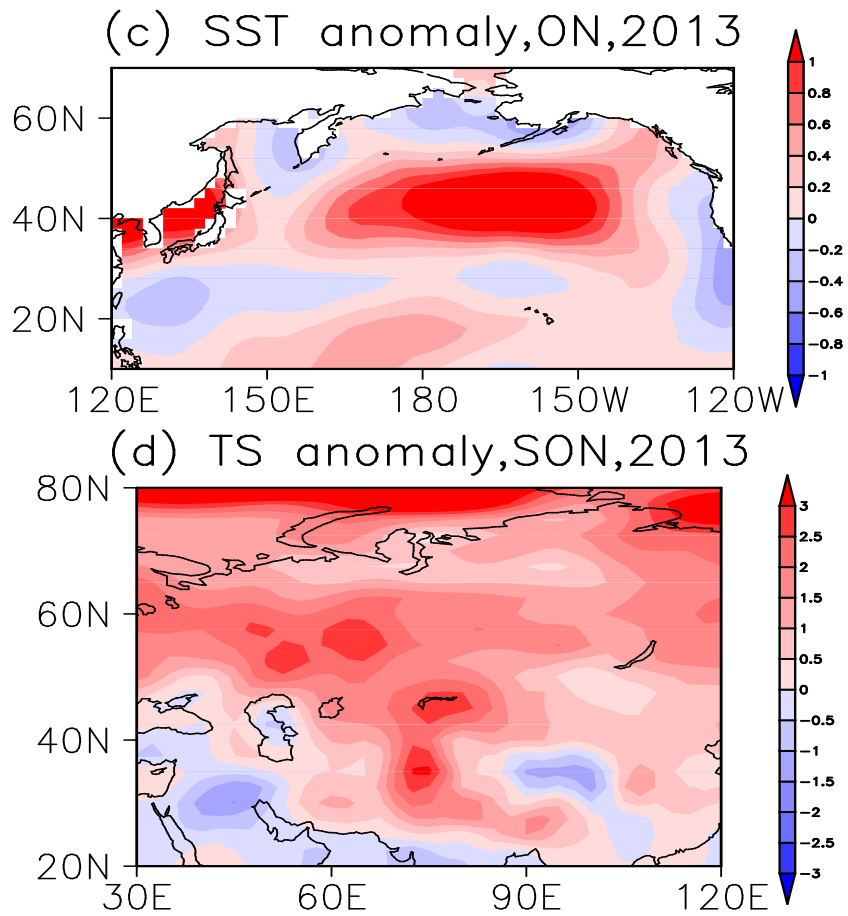

29

30

31 **Figure S6. Anomalies of external forcings in 2013. (a) ASI in pre-autumn, (b) TS in winter, (c) SST in Oct and Nov, and (d) TS in**  
 32 **pre-autumn.**

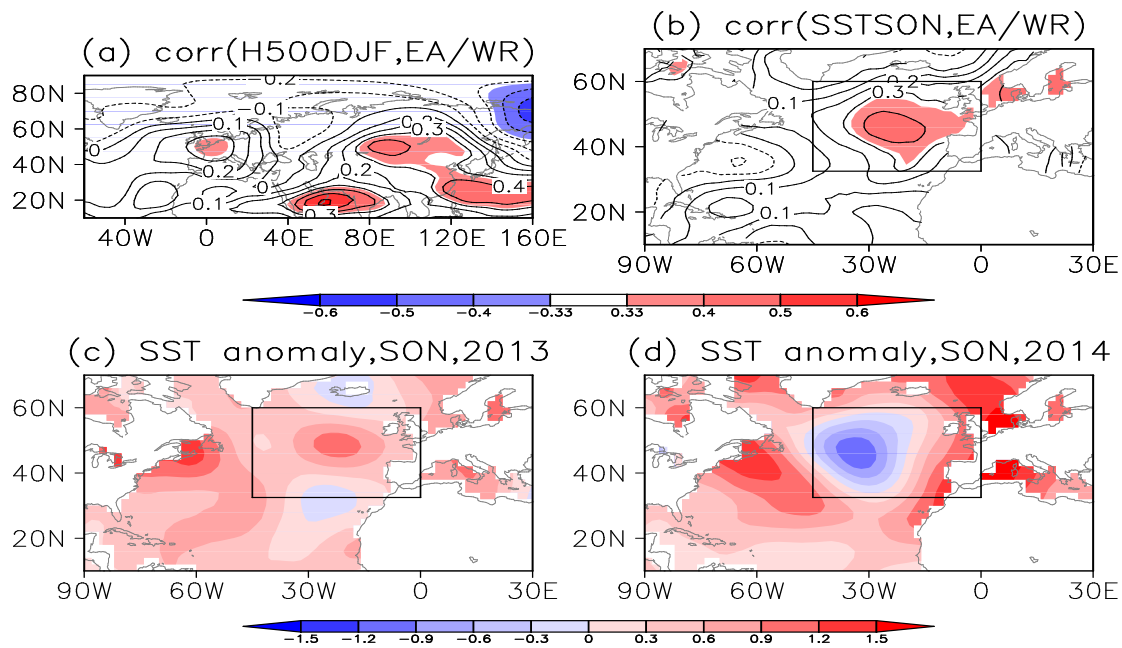

33

34 **Figure S7. Correlation coefficients between EA/WR index and H500 (a) / Atlantic SST in pre-autumn (b). Pre-autumn SST**  
 35 **anomaly during SON in 2013 (c) and 2014 (d)**

36
